# Supplementary material for: Hidden fully-compensated ferrimagnetism
Source: Royal Society of Chemistry journal article supplement (doi:10.1039/d5cp03770k), 2025-11-19
Supplement: d5cp03770k1.pdf [file d5cp03770k1.pdf]

## Hidden fully-compensated ferrimagnetism

San-Dong Guo\*

*School of Electronic Engineering, Xi'an University of Posts and Telecommunications, Xi'an 710121, China*

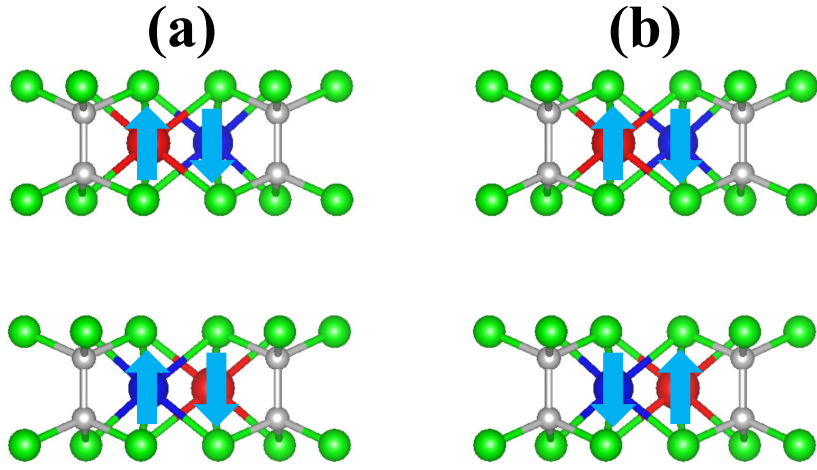

FIG. S1. (Color online) Two magnetic configurations with side view of crystal structure: AFM1 (a) and AFM2 (b) configurations. The blue, red, gray and green balls represent Cr, Mo, C and S atoms, respectively.

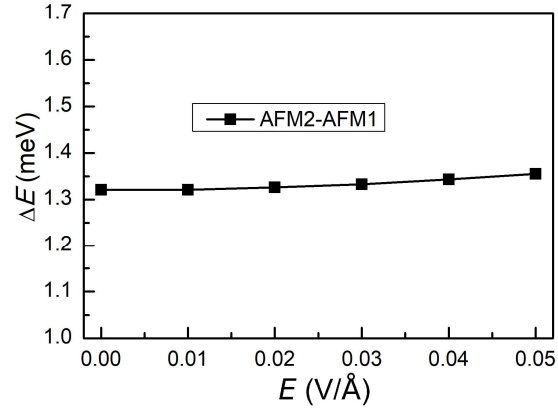

FIG. S2. (Color online) For bilayer  $\text{CrMoC}_2\text{S}_6$ , the energy difference between AFM2 and AFM1 configurations as a function of  $E$ .

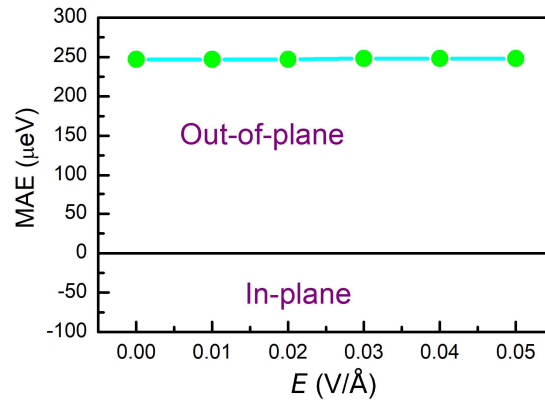

FIG. S3. (Color online) For bilayer  $\text{CrMoC}_2\text{S}_6$ , the MAE as a function of  $E$ .

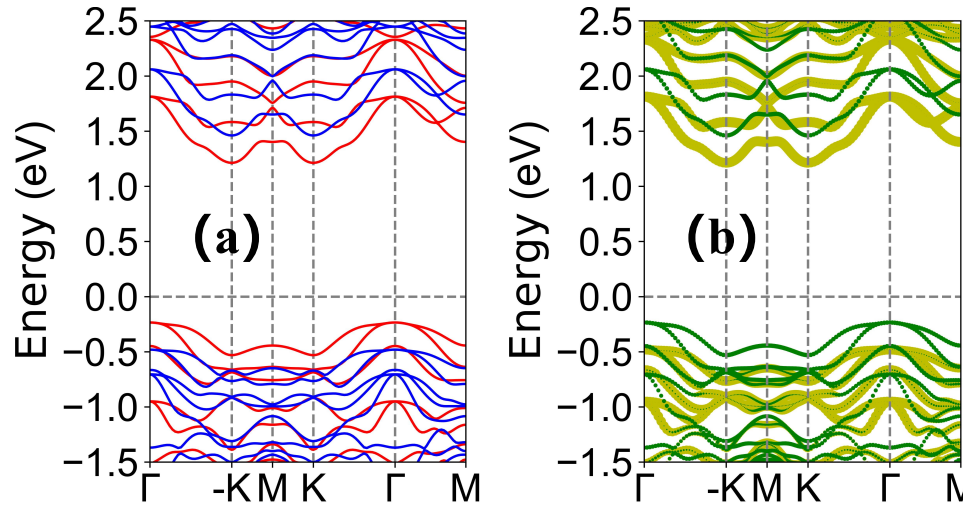

FIG. S4. (Color online) For bilayer  $\text{CrMoC}_2\text{S}_6$ , the energy band structures (a) with layer-characteristic projection (b) at representative  $E = -0.04 \text{ V/\AA}$ . In (a), the spin-up and spin-down channels are depicted in blue and red. In (b), the yellow and green represent lower- and upper-layer characters.
